# Supplementary material for: Genetic Neonatal-Onset Epilepsies and Developmental/Epileptic Encephalopathies with Movement Disorders: A Systematic Review
Source: MDPI journal article supplement (doi:10.3390/ijms22084202), 2021-04-18
Supplement: s1 [file s1]

| Gene    | Disease name, #OMIM                              | design | Oxford Centre for EBM level of evidence | n (gender)          | Mode of Inheritance | Gene Variant(s)                                                                                                                                                | Impact on transcript                                  | Functional studies                   | ACMG criteria | Segregation analysis                                                                                              | Method of ascertainment                                                                                                       | E onset (age)             | seizure semiology                                                                                                                                                                                                                                   | EE/DE                              | E offset (age)          | Neonatal EEG                                                                                                       | Follow-up EEG       | Additional findings                                                                                                                                                                                                | DD                                                                                                                                                | Behavioural/psychiatric features | stagnation/ regression/ progressive symptoms | MD semiology                                                                                                                                                                                                | MD onset (age)            | MD offset (age) | Brain MRI                                                                                                                                                        | Last F/U (age)                | Ref |
|---------|--------------------------------------------------|--------|-----------------------------------------|---------------------|---------------------|----------------------------------------------------------------------------------------------------------------------------------------------------------------|-------------------------------------------------------|--------------------------------------|---------------|-------------------------------------------------------------------------------------------------------------------|-------------------------------------------------------------------------------------------------------------------------------|---------------------------|-----------------------------------------------------------------------------------------------------------------------------------------------------------------------------------------------------------------------------------------------------|------------------------------------|-------------------------|--------------------------------------------------------------------------------------------------------------------|---------------------|--------------------------------------------------------------------------------------------------------------------------------------------------------------------------------------------------------------------|---------------------------------------------------------------------------------------------------------------------------------------------------|----------------------------------|----------------------------------------------|-------------------------------------------------------------------------------------------------------------------------------------------------------------------------------------------------------------|---------------------------|-----------------|------------------------------------------------------------------------------------------------------------------------------------------------------------------|-------------------------------|-----|
| AP3B2   | EIEE48, OMIM #617276                             | OA     | 4                                       | 12<br>2/12          | AR                  | homozygous: c.2522_2525delTCAC<br><br>c.1110 p.1G>C                                                                                                            | frameshift<br><br>skipping of exon 9                  | Performed (only in families 1 and 2) | LP            | heterozygous carrier parents                                                                                      | WES                                                                                                                           | Birth-1 mo                | Subtle NS: 1<br><br>T: 1<br><br>SE (1mo): 1                                                                                                                                                                                                         | EOEE                               | Resolved: 1/2 (age: NA) | NA                                                                                                                 | NA                  | Hypotonia: 2/2<br><br>Reduced/absent DTRs: 2/2<br><br>Microcephaly: 2/2<br><br>Optic nerve pallor: 1/2                                                                                                             | Severe/profound DD:2/2<br><br>Absent speech: 2/2                                                                                                  | -                                | (Regression, infantile-onset)                | Stereotypies: 2/2<br><br>Dyskinesia: 2/2<br><br>(Choreo-athetosis, infantile onset)                                                                                                                         | NA                        | NA              | N: 1<br><br>thin CC, enlarged extra-axial space: 1                                                                                                               | 32mo; 24mo                    | 38  |
| ATP1A3  | alternating hemiplegia of childhood, OMIM#614820 | CS     | 4                                       | 2 (1F)              | AD                  | c.1073G>T, p.Gly358Val                                                                                                                                         | In-frame deletion                                     | performed                            | LP            | De novo                                                                                                           | NGS                                                                                                                           | 4h                        | Onset: NA<br><br>Follow-up: Todd paralysis                                                                                                                                                                                                          | EOEE                               | -                       | NA                                                                                                                 | Multifocal seizures | postnatal microcephaly                                                                                                                                                                                             | DD                                                                                                                                                | -                                | -                                            | episodes of nystagmus, disconjugate gaze, mouth and tongue movements, and reduced responsiveness<br><br>continuous athetotic movements                                                                      | 2mo<br><br>11mo           | -               | progressive atrophy                                                                                                                                              | 16mo (died)                   | 13  |
| ATP1A3  | alternating hemiplegia of childhood, OMIM#614820 | CR     | 4                                       | 1 M                 | AD                  | c.2736_2738CTTdel, p.Phe913del                                                                                                                                 | ?                                                     | Not performed                        | ?             | De novo                                                                                                           | WES                                                                                                                           | D2                        | NA                                                                                                                                                                                                                                                  | «Catastrophic early-life epilepsy» | -                       | Focal (multifocal ictal events, non-migrating)                                                                     | NA                  | Extreme hypotonia<br><br>microcephaly<br><br>feeding difficulties<br><br>respiratory and cardiac failure                                                                                                           | Profound DD                                                                                                                                       | -                                | -                                            | Non-epileptic tonic and dystonic events, episodic oculomotor abnormalities with tachycardia                                                                                                                 | D2                        | -               | High GP intensity bilaterally (D6)<br><br>delayed myelination (10mo)<br><br>progressive atrophy (2y and 4y)                                                      | 4y                            | 14  |
| CACNA1E | EIEE69, OMIM #618285                             | R OA   | 4                                       | 33 (19F), unrelated | AD                  | c.683T>C c.1042G>C c.1054G>A in 9 c.1807A>C c.2069G>A c.2093T>C c.2098G>A c.2101A>G in 3 c.2104G>A in 6 c.2104G>C c.4264A>T c.4274C>A in 2 c.4288G>A c.5159C>G | Missense n= 30<br><br>premature termination codons: 3 | performed                            | P             | De novo except for 2 cases:<br><br>n=1 parents unavailable<br><br>n= 1 mother tested negative, father unavailable | Trio WES + Sanger validation (duo WES performed in 1) OR<br><br>Research-based trio WGS<br><br>OR NGS targeted panel analysis | Mean 8 mo (range : D1-3y) | Whole cohort: Multiple: 21/30 ES: 16/30 (53.3%)<br>FM: 10/30 (33.3%)<br>T: 9/30 (30%)<br>Myo: 8/30 (26.7%)<br>GTCS: 6/30 (20%)<br>fias: 6/30 (20%)<br>SE : 2/30 (6.7%)<br>gel: 1/30 (3.3%)<br>At : 1/30 (3.3%)<br><br>Neonatal: ES 2<br><br>Myo : 2 | 26/30                              | -                       | MFD: 15/30 (50%)<br><br>Hyps: 8/30 (26.7%)<br><br>CSWS, FD, Slow SW, B-S: 1/30 (3.3%) each<br><br>N.A.: 3/30 (10%) |                     | Prominent axial hypotonia: 100% spastic quadriplegia: 16/30 (53%)<br><br>Congenital joint contractures: 13/30 (43%)<br><br>Macrocephaly: 12/28 (43%)<br><br>Early death: 7 (23%) median age 2.7 y (range 11mo-25y) | DD: profound 26/30 (86.6%)<br>Severe 3/30 (10%)<br>unspecified: 1/30 (3.3%)<br><br>Of the probands > 2 y: 21/24 (88%) non-verbal & non-ambulatory | -                                | Developmental regression : 9/30 (30%)        | Dystonia : 12/30 (40%)<br><br>Chorea: 3/30 (10%)<br><br>Dyskinesias: 2/30 (6.7%)<br><br>Myoclonus: 1/30 (3.3%)<br><br>Unknown: 1/30 (3.3%)<br><br>"Hyperkinetic": 1/30 (3.3%)<br><br>Multiple: 4/30 (13.3%) | Early-onset (unspecified) | -               | N: 19/30 (28.9%), WM loss: 2/30 (6.7%), Cortical atrophy: 4/30 (13.3%), WM hyperintensity, BG hyperintensity, Delayed myelination, Thin CC, NA: 1/30 (3.3%) each | Mean: 6.3 y (range: 10 m-25y) | 35  |

|              |                                                  |      |   |                                                                      |     |                                                     |                                          |                                                  |         |                                        |                                                     |                                  |                                                                            |           |                                         |                                                                                                            |                                                 |                                                                                                   |                                                                              |                                                                                                                                                   |                                                                                                                                |                                                                                       |              |             |                                                                                         |                             |    |
|--------------|--------------------------------------------------|------|---|----------------------------------------------------------------------|-----|-----------------------------------------------------|------------------------------------------|--------------------------------------------------|---------|----------------------------------------|-----------------------------------------------------|----------------------------------|----------------------------------------------------------------------------|-----------|-----------------------------------------|------------------------------------------------------------------------------------------------------------|-------------------------------------------------|---------------------------------------------------------------------------------------------------|------------------------------------------------------------------------------|---------------------------------------------------------------------------------------------------------------------------------------------------|--------------------------------------------------------------------------------------------------------------------------------|---------------------------------------------------------------------------------------|--------------|-------------|-----------------------------------------------------------------------------------------|-----------------------------|----|
| CDKL5        | EIEE2, OMIM #300672                              | P OA | 4 | 92 Rett/Rett-like<br><br>17 Angelman-like<br><br>NE + MD: 2/7        | XLD | c.903_904dupGA, p.Leu302Aspfx49X<br><br>c.2376+5G>A | Frameshift<br><br>Abolishing splice site | Not performed                                    | P LP    | De novo: 2/2                           | Sequencing + MLPA                                   | 2w; 3w                           | Onset: Myo: 1 F: 1<br><br>Evolution: F with impaired awareness: 1 F myo: 1 | EOEE: 2/2 | Ongoing: 1<br><br>Seizure-free (6mo): 1 | NA                                                                                                         | Slow: 1<br><br>MFD: 1<br><br>Unspecified ED: 1  | Hypotonia: 2/2<br><br>Head deceleration: 2/2<br><br>Scoliosis: 1/2<br><br>Autonomic features: 1/2 | Severe ID: 1/2<br><br>Mild: ½<br><br>Ambulant: 1/6<br><br>Absent speech: 1/2 | Autistic features: 1/2<br><br>Eye contact absent/inconstant: 2/2<br><br>p.Leu302Aspfs X49 → Angelman phenotype<br><br>c.2376+5G>A → Atypical Rett | n= 1, age NA                                                                                                                   | Hand stereotypies: 2/2                                                                | NA           | -           | N: 1<br><br>NA: 1                                                                       | 7mo; 6y                     | 41 |
| DNM1         | EIEE31, OMIM #616346                             | R OA | 4 | 21 (7 pu)<br><br>NE + MD: 1/21                                       | AD  | c.127G.A, p.Gly43Ser                                | missense                                 | Not performed (in silico prediction models used) | P       | De novo                                | NGS panel/WES                                       | 3w                               | Myo<br><br>Ab                                                              | DEE       | Seizure-free (6y, LEV + LTG)            | nonspecific background slowing                                                                             |                                                 | Microcephaly<br><br>spasticity<br><br>hypotonia                                                   | profound DD<br><br>(non-verbal non-ambulant)                                 |                                                                                                                                                   |                                                                                                                                | Dystonia                                                                              | NA           | NA          | N                                                                                       | 8y                          | 43 |
| FOXG1        | Rett syndrome , congenital variant, OMIM #613435 | OA   | 4 | 45 (23F)<br><br>MD: 45/45 (100%)<br><br>E + MD: 35<br><br>NE + MD: 1 | AD  | del14q12 (18,798,641–19,484,013)                    | CNV                                      | Not performed                                    | P       | De novo                                | array CGH                                           | D2                               | F                                                                          | -         | < 1 FS/month                            | NA                                                                                                         | NA                                              | Limited hand movement                                                                             | DD                                                                           | -                                                                                                                                                 | -                                                                                                                              | generalized hyperkinetic<br><br>dyskinetic<br><br>orolingual<br><br>hand stereotypies | -            | -           | Mild SIMPyral pattern moderate cortical atrophy, myelination delay, hypoplastic CC      | 8y                          | 44 |
| FGF12 (FHF1) | EIEE47, OMIM #617166                             | OA   | 4 | 2 related (1M)                                                       | AD  | c.155G.A, p.R52H                                    | missense                                 | performed                                        | P       | De novo (suspected germline mosaicism) | WES                                                 | 2w; 4w                           | T: 2<br><br>SE                                                             | EOEE      | -                                       | severe background slowing<br><br>MFD<br><br>Ictal: low voltage fast activity, followed by long suppression | Hyps (without IS): 1 (5mo)                      | Hypotonia: 2<br><br>Microcephaly: 2<br><br>Feeding difficulties: 2<br><br>pale optic discs        | Profound GDD (non-ambulant, non-verbal)                                      | -                                                                                                                                                 | Regression following sz onset (N prior to sz onset)<br><br>Degeneration (decrease in alertness, general condition, and skills) | Limbs Ataxia: 1<br><br>Ataxia: 1                                                      | NA           | -           | N (2mo; 5mo)<br><br>Cerebellar atrophy (3y; 6y)                                         | Died: 7y (SE); 3.5y         | 37 |
| GABRA1       | EIEE19, OMIM #615744                             | OA   | 4 | 6<br><br>NE + MD: 2/6                                                | AD  | c.788T>C (p.M263T)<br><br>c.859G>T (p.V287L)        | missense                                 | Not performed (in silico prediction models used) | P : 2/2 | De novo                                | WES (546)<br><br>GABRA1 targeted resequencing (145) | Mean: 2.6mo (range : Birth–10mo) | Onset Myo: 1 T: 1<br><br>Evolution WS: 1 EOEE: 1                           | EOEE      | Refractory: 1<br><br>GBP: 1 (Age NA)    | Trace alternant with MFD: 1<br><br>Diffusely slow with MFD: 1                                              | Hyps with MFD: 1<br><br>B-S: 1                  | Acquired microcephaly: ½<br><br>NA: ½<br><br>Hypertonia: 1/2                                      | Profound ID                                                                  | -                                                                                                                                                 | -                                                                                                                              | Myoclonus: 1<br><br>Choreathetosis: 1                                                 | NA<br><br>NA | -<br><br>2y | N (birth) - Cerebral atrophy (3mo): 1<br><br>Sovra+Sub-tentorial atrophy, thin CC (4 y) | 10y: 1<br><br>died at 1y: 1 | 45 |
| GABRB2       | EIEE2, OMIM #617829                              | P OA | 4 | 6<br><br>NE + MD: 1/6                                                | AD  | c.908A>G (p.Lys303Arg)                              | missense                                 | Not performed (in silico prediction models used) | P       | De novo                                | Targeted NGS panel                                  | D1                               | T, F, MF                                                                   | EOEE      | Ongoing (improved on TPM)               | MFD<br><br>Slow background                                                                                 | NA                                              | Microcephaly<br><br>Hypotonia<br><br>feeding difficulties                                         | GDD<br><br>Severe ID                                                         | -                                                                                                                                                 | -                                                                                                                              | dystonia                                                                              | NA           | NA          | WM T2 hyperintensity                                                                    | 7 y                         | 46 |
| GABRB3       | EIEE43, OMIM #617113                             | R OA | 4 | E + MD: 7/22<br><br>NE + MD: 1/22                                    | AD  | c.767T.A, p.L256Q                                   | missense                                 | Performed                                        | P       | De novo                                | Massive parallel sequencing                         | D1                               | F GTC IS                                                                   | EOEE      | pharmacoresistant                       | Hyps<br><br>GD                                                                                             |                                                 | Hypotonia                                                                                         | Severe DD                                                                    |                                                                                                                                                   | Stagnation: 3mo                                                                                                                | Dyskinesia: 1                                                                         | NA           | NA          | Hypomyelination                                                                         | NA                          | 47 |
| GABRG2       | EIEE74, OMIM #618396                             | R CS | 4 | 5, unrelated (3F)<br><br>NE + MD: 1/5                                | AD  | p.A106T (c0.316G>A)                                 | missense                                 | Not performed (in silico prediction models used) | P       | De novo                                | NGS panel                                           | D1                               | NS (not defined)<br><br>Myo<br><br>F versive with impaired awareness       | EOEE      | Response to LEV + OXC (age NA)          | unremarkable<br><br>Excess Beta activity<br><br>Frontal sharp                                              | CVI<br><br>Hypotonia<br><br>Dysmorphic features | Severe (non-ambulatory, verbal: NA)                                                               | Lack of social smile, poor visual interaction                                | -                                                                                                                                                 | Continuous stereotypies                                                                                                        | NA                                                                                    | -            | N           | 13y                                                                                     | 55                          |    |

|               |                       |      |   |                                                      |    |                                                                     |                          |                                                                       |         |                                                                                                                       |                               |                          |                                                                                                                      |           |                             |                                                                                               |                                                                                          |                                                                     |                                              |        |                  |                                                                                                                  |                            |                                                                                  |                                                                                                        |                                              |    |
|---------------|-----------------------|------|---|------------------------------------------------------|----|---------------------------------------------------------------------|--------------------------|-----------------------------------------------------------------------|---------|-----------------------------------------------------------------------------------------------------------------------|-------------------------------|--------------------------|----------------------------------------------------------------------------------------------------------------------|-----------|-----------------------------|-----------------------------------------------------------------------------------------------|------------------------------------------------------------------------------------------|---------------------------------------------------------------------|----------------------------------------------|--------|------------------|------------------------------------------------------------------------------------------------------------------|----------------------------|----------------------------------------------------------------------------------|--------------------------------------------------------------------------------------------------------|----------------------------------------------|----|
|               |                       |      |   |                                                      |    |                                                                     |                          |                                                                       |         |                                                                                                                       |                               | s                        |                                                                                                                      |           |                             |                                                                                               |                                                                                          |                                                                     |                                              |        |                  |                                                                                                                  |                            |                                                                                  |                                                                                                        |                                              |    |
| GRIA2 (GluA2) | OMIM#138247           | OA   | 4 | 28 pts<br><br>E + MD: 7/28 (4F)<br><br>NE + MD: 2/24 | AD | c.2363G>T<br><br>p.Trp788Leu<br><br>c.1915G>T p.Ala639Ser           | missense<br><br>missense | Performed                                                             | LP: 2/2 | De novo: 2/2                                                                                                          | WES                           | Birth; D7                | Onset<br>T hypomotor<br>Myo eye blinking and mastication, +/- hypertonia and bradycardia<br><br>Follow-up<br>ES<br>F | DEE       | -                           | N background: 2<br><br>MFD: 1                                                                 | MFD<br><br>High voltage slow background<br><br>Microcephaly: 1<br><br>Axial hypotonia: 2 | Deceleration of head growth: 1                                      | yes                                          | -      | -                | myoclonus in the face and limbs<br>Exaggerated startle response: 1<br><br>Hypokinetic: 1<br>Oculogyric crises: 1 | Neonatal<br><br><br>3y     | -                                                                                | Cerebellar atrophy: 1<br><br>Cerebellar vermis hypoplasia: 1<br><br>hypo-myelinating leukodystrophy: 1 | 3.5y<br><br>3mo (died of SUDEP; p.Ala639Ser) | 51 |
| GNAO1         | EIEE17, OMIM #615473  | OA   | 4 | 14<br><br>NE + MD: 3/14                              | AD | c.119G>A (p.G40E)<br><br>c.818A>T (D273V)<br><br>c.836T>A (p.I279N) | Missense: 3/3            | Not performed (in silico prediction models used)                      | P: 3/3  | De novo: c.836T>A; c.818A>T<br><br>Suspected parental germline mosaicism (2%, below reporting threshold) for c.119G>A | Targeted NGS panel<br><br>WES | Neonatal: 3 (1h, 2h, D2) | Onset<br>"T-C": 2<br>ES: 1<br><br>Evolution:<br>IS: 1<br>F: 1<br>NA: 1                                               | DEE: 3/3  | -                           | MFD: 2<br><br>high amplitude bursts: 1<br><br>Abn: 1<br><br>IED: 1                            | Mod Hyps (8mo): 1<br><br>Sev abn: 1<br><br>FD: 1                                         | Hypotonia: 3/3<br>Scoliosis: 1<br>Swallowing dysfunction: 1         | ID: 3/3<br><br>Non-ambulant, non-verbal: 2/3 | -      | Yes (stagnation) | Focal dystonia: 1<br>Dyskinesia: 1<br>Chorea: 1<br>Akathisia: 1<br><br>(multiple : 2)                            | 12 mo: 1<br><br>NA: 4/5    | NA                                                                               | N: 1<br>Increased GP signal: 1<br>Delayed myelination: 1<br>Atrophy: 1                                 | 2; 6; 15y                                    | 15 |
| GNAO1         | EIEE17, OMIM #615473  | CR   | 4 | 1F                                                   | AD | c.596T>C p.Leu199Pro                                                | missense                 | Not performed (in silico prediction models used)                      | P       | De novo                                                                                                               | Trio-WES                      | neonatal                 | T/subtle                                                                                                             | EOEE      | Seizure-free on KD (age NA) | Sev abn background with poor differentiation and no sleep elements + bilateral IED<br><br>MFD | Sev abn background with poor differentiation and no sleep elements + bilateral IED       | Severe axial hypotonia<br><br>Microcephaly<br><br>Poor eye fixation | Severe GDD                                   | -      | -                | Dyskinetic buccolingual movements<br><br>Reduced spontaneous movements<br><br>startle                            | 21mo<br><br>3mo<br><br>3mo | -                                                                                | Mild cerebral atrophy, thin CC, delayed myelination                                                    | 21mo                                         | 19 |
| GNAO1         | EIEE17, OMIM #615473  | OA   | 4 | 4 pts<br><br>NE + MD: 1/4                            | AD | c.607G4A p.(Gly203Arg)                                              | missense                 | Not performed (previously described)                                  | P       | De novo                                                                                                               | WES + Sanger sequencing       | D7                       | Onset<br>"T-C"<br><br>Evolution<br>F with impaired awareness                                                         | EOEE      | refractory                  | Slow-wave bursts, Migrating FD                                                                | MFS<br><br>Asymmetry                                                                     | -                                                                   | Profound DD                                  | -      | --               | Severe chorea                                                                                                    | NA                         | -                                                                                | N (D20)<br>Progressive cerebral atrophy + delayed myelination (14 mo)                                  | 14mo                                         | 16 |
| GNAO1         | EIEE17, OMIM #615473  | R OA | 4 | 4 F<br><br>NE + MD: 1/4                              | AD | c.572_592 del p.Thr191_Phe197 del                                   | frameshift               | Performed                                                             | P       | De novo                                                                                                               | WES + mutation screening      | 2w                       | T                                                                                                                    | EOEE (OS) | refractory                  | B-S                                                                                           | Hyps (4mo)                                                                               | -                                                                   | Profound DD                                  | -      | -                | Dystonia                                                                                                         | NA                         | -                                                                                | N (3mo)                                                                                                | 11mo (died)                                  | 17 |
| GNAO1         | EIEE17, OMIM #615473  | OA   | 4 | 4 pts (3F)<br><br>NE + MD: 1/4                       | AD | c.607G > A p.Gly203Arg                                              | missense                 | Not performed ((in silico prediction models, additional descriptions) | P       | De novo                                                                                                               | WES                           | D9                       | Onset<br>F with apnoea<br><br>Evolution<br>T, T-C, hypomotor autonomic                                               | EOEE      | Effective LTG+ZNS (age NA)  | abn                                                                                           | Ictal T discharges                                                                       | Hypotonia<br><br>Dysphagia (PEG-fed)                                | DD                                           | -      | -                | Dystonic movements                                                                                               | NA                         | Gap entin, trihexyphenidyl: no effect; BDZ: reduced paroxysmal dystonia (age NA) | N                                                                                                      | 4y                                           | 18 |
| GRIN2B        | EIEE27, OMIM # 616139 | R    | 4 | 39 N<br><br>E + MD: 6                                | AD | c.2065G>A p.(Gly689Ser)                                             | missense                 | Performed                                                             | P       | De novo                                                                                                               | NGS panel                     | D1                       | Onset<br>Subtle sz<br><br>Evolution:                                                                                 | WS        | -                           | NA                                                                                            | FD                                                                                       | Hypertonus                                                          | Severe ID                                    | ASD: 2 | 4/58 (MD:        | Dyskinetic                                                                                                       | NA                         | NA                                                                               | N                                                                                                      | 1y                                           | 53 |

|        |                                                                              |               |   |                                                                                   |    |                                                                                                                 |                     |                                                  |                                     |                               |                                           |                              |                                                             |                                  |                                                  |                                                                         |                                              |                                                                           |                                                       |                        |    |                                                                                                                                                                                                      |                        |                                  |                                                                                                                                     |                                           |    |    |
|--------|------------------------------------------------------------------------------|---------------|---|-----------------------------------------------------------------------------------|----|-----------------------------------------------------------------------------------------------------------------|---------------------|--------------------------------------------------|-------------------------------------|-------------------------------|-------------------------------------------|------------------------------|-------------------------------------------------------------|----------------------------------|--------------------------------------------------|-------------------------------------------------------------------------|----------------------------------------------|---------------------------------------------------------------------------|-------------------------------------------------------|------------------------|----|------------------------------------------------------------------------------------------------------------------------------------------------------------------------------------------------------|------------------------|----------------------------------|-------------------------------------------------------------------------------------------------------------------------------------|-------------------------------------------|----|----|
|        |                                                                              |               |   | NE + MD: 1/6                                                                      |    |                                                                                                                 |                     |                                                  |                                     |                               |                                           | ES                           |                                                             |                                  |                                                  |                                                                         |                                              |                                                                           |                                                       | 1/6)                   |    |                                                                                                                                                                                                      |                        |                                  |                                                                                                                                     |                                           |    |    |
| KCNMA1 | cerebellar atrophy, developmental delay, and seizures, OMIM #617643          |               | 4 | 2<br><br>NE + MD: 1/2                                                             | AD | c.2650G>A p.Glu884Lys<br><br>c.3158A>G p.Asn1053Ser                                                             | missense            | Not performed (in silico prediction models used) | LP<br>c.2650G>A<br><br>P: c.3158A>G | De novo                       | Targeted NGS panel                        | D20                          | NA                                                          | NA                               | -                                                | N                                                                       |                                              | ????                                                                      | DD<br><br>Severe                                      | NA                     | NA | NA                                                                                                                                                                                                   | PNKD                   | NA                               | NA                                                                                                                                  | N                                         |    | 54 |
| KCNQ2  | EIEE7, OMIM # 613720                                                         | R Case series | 4 | NE + MD: 2/2<br><br>(1F)                                                          | AD | c.619C>T p.Arg207Trp                                                                                            | missense            | Not performed                                    | P                                   | Maternally inherited          | Direct sequencing                         | D2                           | Clonic + desaturation: 1<br><br>Focal tonic: 1              | Familial neonatal-onset epilepsy | Neonatal period offset: 1<br><br>12y: 1 (on LTG) | Bilat background slowing (adult): 1<br>Rolandic discharges (newborn): 1 |                                              | Myokymia of the abdominal wall muscles                                    | GDD (language most affected): 1<br><br>ID: 1          | Reduced attention span | -  | Paroxysmal "myoclonus-like" dyskinesia (limbs, eye, diaphragm, limbs, vocal cord)<br><br>ataxic gait, hyperkinetic dyskinesia, mild distal tremor<br><br>"myoclonus-like" dyskinesia in her limbs: 1 | 3w<br><br>2y<br><br>NA | -                                | N MRI: 1<br><br>Bilaterally open operculum, irregular gyral pattern, small F lobes, abnormal extra-axial fluid quantity: 1          | 28 mo: 1<br><br>Adulthood, unspecified: 1 | 22 |    |
| KCNQ2  | EIEE7, OMIM # 613720                                                         | CR            | 4 | 1M                                                                                | AD | c.619C>T (p.R207 W).                                                                                            | missense            | Not performed                                    | P                                   | De novo                       | Trio WES                                  | D7                           | F                                                           | KCNQ2-DEE                        | Neonatal period offset (OXC)                     | NA                                                                      | N                                            | hypotonia                                                                 | mild                                                  | NA                     | -  | Chorea and myoclonus during febrile illnesses                                                                                                                                                        | NA                     | Cesation with febrile resolution | N                                                                                                                                   | 8y                                        | 24 |    |
| KCNQ2  | EIEE7, OMIM # 613720                                                         | OA            | 4 | NE + MD: 1/8 (M)                                                                  | AD | c.1636A>G p.Met546Val                                                                                           | missense            | Not performed                                    | P                                   | De novo                       | Direct sequencing                         | D3                           | T + hemiconic + eyelid myoclonia                            | KCNQ2-DEE                        | 3y                                               | B-S                                                                     | MFD (3w)<br><br>N (8y)                       | Mild spasticity<br><br>dysmorphisms<br><br>hypospadias                    | DD, non-verbal                                        | autism                 | -  | Hand stereotypies: 1<br><br>broad-based gait                                                                                                                                                         | NA                     | -                                | Whole cohort: T1 and T2 BG and thalamic hyperintensities (less obvious with decreasing age)                                         | 9y                                        | 20 |    |
| KCNQ2  | EIEE7, OMIM # 613720                                                         | OA            | 4 | NE + MD: 4/11 (3F)                                                                | AD | c.943G>C, p.Gly315Arg<br><br>c.973A>G, p. Arg325Gly<br><br>c.1655A>C, p.Lys552Thr<br><br>c.1687G>A, p.Asp563Asn | missense            | Not performed (in silico prediction models used) | P: 4/4                              | De novo                       | Sanger direct sequencing<br><br>NGS panel | D1: 3<br><br>D3: 1           | T, apnoea, desaturation, bradycardia, desaturation, chewing | KCNQ2-DEE                        | 1 sz-free (10 mo)                                | B-S: 3<br><br>FD: 1                                                     | Slow background: 3<br><br>N: 1<br><br>MFD: 4 | Axial hypotonia                                                           | Profound DD: 2<br><br>Mild/Mod: 1<br><br>Severe ID: 1 | Autistic features: 1   | -  | Opisthotonus: 1<br><br>Dystonic posturing: 3<br><br>Hand stereotypies: 2                                                                                                                             | NA                     | -                                | F lobes atrophy: 2<br><br>reduced WM: 2<br><br>thin CC: 2<br><br>small thalami: 2 (11mo; N at 4mo; 3w)<br><br>dilated ventricles: 2 | NA                                        | 21 |    |
| KCNQ2  | EIEE7, OMIM # 613720                                                         | CR            | 4 | 1M                                                                                | AD | c.913_915del [p.Phe305del]]                                                                                     | Intragenic deletion | Not performed (additional descriptions)          | P                                   | De novo                       | NGS panel                                 | 10h                          | F T + Tonic spasms                                          | KCNQ2-DEE                        | 2mo (CBZ)                                        | B-S                                                                     | Abnormal<br><br>MFD                          | Pyramidal syndrome                                                        | Profound DD                                           | -                      | -  | dystonia                                                                                                                                                                                             | 9mo                    | -                                | Thin CC                                                                                                                             | 9mo                                       | 23 |    |
| PCDH12 | diencephalic-mesencephalic junction dysplasia syndrome 1<br><br>OMIM #251280 | Case series   | 4 | n= 4<br><br>3 (2F) from 3 consanguineous families<br><br>E + MD: ¾<br><br>NA: 1/4 | AR | Biallelic c.2515C>T p.Arg839 (4)                                                                                | nonsense            | Performed                                        | P                                   | Parents heterozygous carriers | WES + homozygosity mapping                | Mean: D10.6 (range : D4-D21) | F: 2<br><br>T:1<br><br>IS: 1<br><br>Multiple types:         | 1/3 (IS)                         | -                                                | Hyps: 1/3<br>MFD: 1/3<br>FD: 1/3                                        |                                              | Axial hypotonia: 3/3<br>VI:3/3<br><br>Progressive microcephaly: ¾ (NA: ¼) | profound                                              | No acquisition         | -  | Dystonia : 3/3                                                                                                                                                                                       | Congenital             | -                                | Midbrain hypothalamus- optic tract dysplasia: 3/3                                                                                   | 16.6 y (range: 3-26)                      | 39 |    |

|          |                                                               |              |   |                                                       |    |                                                                                                                           |                                         |                                                    |                                                                                                                     |                                                                                                                                  |                                                                                |                                                        |                                                                                                                                         |                                 |                                                                                        |                                                                              |    |                                                      |                                                                                                                                                  |                      |      |                                                                                                                                                                                 |                                 |                                                     |                                                                 |                              |    |
|----------|---------------------------------------------------------------|--------------|---|-------------------------------------------------------|----|---------------------------------------------------------------------------------------------------------------------------|-----------------------------------------|----------------------------------------------------|---------------------------------------------------------------------------------------------------------------------|----------------------------------------------------------------------------------------------------------------------------------|--------------------------------------------------------------------------------|--------------------------------------------------------|-----------------------------------------------------------------------------------------------------------------------------------------|---------------------------------|----------------------------------------------------------------------------------------|------------------------------------------------------------------------------|----|------------------------------------------------------|--------------------------------------------------------------------------------------------------------------------------------------------------|----------------------|------|---------------------------------------------------------------------------------------------------------------------------------------------------------------------------------|---------------------------------|-----------------------------------------------------|-----------------------------------------------------------------|------------------------------|----|
| PURA     | mental retardation, autosomal dominant 31, OMIM #616158       | OA + lit R/w | 4 | 30<br><br>NE + MD: 1/30                               | AD | c.812_814del p.(Phe271del)                                                                                                | Intragenic deletion                     | Performed                                          | P                                                                                                                   | De novo                                                                                                                          | WES                                                                            | neonatal                                               | myoclonic                                                                                                                               | NA                              | NA                                                                                     | Abnormal (not described)                                                     | NA | Hypotonia                                            | Mod ID (non-ambulant, non-verbal)                                                                                                                | -                    | -    | NA                                                                                                                                                                              | NA                              | NA                                                  | N                                                               | 23 mo(last examined at 11mo) | 49 |
| RHOBT B2 | EIEE64, OMIM #618004                                          | R            | 4 | 10 (6F)<br><br>E + MD: 9/10 (90%)<br><br>NE + MD: 1/9 | AD | c.1448G>A                                                                                                                 | missense                                | Performed                                          | P/LP                                                                                                                | De novo                                                                                                                          | Trio WES                                                                       | Range : D4-3y (mean: 5m)                               | "Generalized"                                                                                                                           | yes                             | Yes age NA                                                                             | NA                                                                           |    | Hypotonia<br><br>LL's hypertonia<br><br>dysmorphisms | Severe                                                                                                                                           |                      |      | Chorea Dystonia<br><br>Paroxysmal dyskine tic attacks<br><br>Multiple types: 1                                                                                                  | NA                              | NA                                                  | Delayed myelination                                             | 3.5y                         | 52 |
| SCN2A    | DEE11, OMIM #613721<br><br>BFIS3, #607745<br><br>EA9, #618924 | R OA         | 4 | 12<br><br>EE + MD: 10 (5F)<br><br>NE + MD: 7          | AD | c.4777G>A c.2715G>C<br>c.5645G>A c.4901G>T<br>c.653C>A c.718G>T<br><br>c.2567G>T (mosaic, 34% mutant load in lymphocytes) | missense                                | Not performed                                      | P:<br>c.4777G>A<br>c.2715G>C<br>c.2567G>T<br><br>LP:<br>c.5645G>A<br>c.4901G>T<br>c.718G>T<br>c.653C>A<br>c.2567G>T | De novo: 6/7<br><br>not maternal, paternal DNA NA (c.653C.A)                                                                     | Targeted sequencing with molecular inversion probes<br><br>WES                 | 21.95 mo (0-17y)                                       | F (multiple types): 7<br><br>T: 1<br><br>ES: 2                                                                                          | EE: 7/7<br><br>EIMFS: 5<br>OS:2 | 2/7<br><br>(3mo, 3.5mo)                                                                | MFD: 7/7<br><br>BS: 2/7<br><br>N/slow: 5<br><br>N: 1                         |    | Axial hypotonia: 6<br><br>Appendicular hypertonia: 4 | Mild/mod DD: 1<br><br>Sev/Prof: 5<br><br>N: 1<br><br>Mild LD: 1                                                                                  | Autistic features: 1 | none | Stereotypies: 1<br>Oculogyric crises: 2<br>Opisthotonus: 1<br>Dystonia : 4<br>Chorea: 1<br>Multiple: 2                                                                          | -                               | -                                                   | WM involvement: 7<br><br>BG: 6<br><br>Brainstem: 2<br><br>NA: 1 |                              | 36 |
| SCN2A    | DEE11, OMIM #613721<br><br>BFIS3, #607745<br><br>EA9, #618924 | R            | 4 | 4<br><br>NE + MD: (3M)                                | AD | c.5644C>G<br><br>c.5644C>G c.4565G>C (in cys)<br><br>c.788C>T in 2                                                        | Missense                                | Yes (whole-cell patch-clamping in mammalian cells) | P                                                                                                                   | De novo, except c.4565G>C (paternal origin)                                                                                      | Direct sequencing (1 pt), NGS epilepsy panel (2 pts), PCR amplification (1 pt) | Mean: D8.5 (D1-D24)                                    | Bilateral TC with desaturation and unresponsiveness; multifocal TC and clon; bilateral; hypomotor followed by TC with alternating sides | Neonatal epilepsy: 4/4          | 4/4<br><br>Mean: 7.5 mo (range: 5-13)<br><br>Isolated seizures at 3.5, 6.5, 14.5y in 1 | Mildly abn: 1<br><br>Ictal with contralateral EEG discharges: 1<br><br>NA: 2 | -  | Hypotonia: 1/4                                       | Mild DD: 1<br><br>NA: 3/4                                                                                                                        | NA                   | NA   | EA (Dizziness/unsteady gait possibly with associated with slurred speech, myoclonic jerks, distress, headache, pain, hypermotor activity, hyperventilation, retching, vomiting) | Mean: 24.3mo (range: 15mo-3.7y) | Poor drug response (Acetazolamide, 4-aminopyridine) | NA                                                              | Mean: 11y (Range: 5-17y)     | 36 |
| SCN2A    | DEE11, OMIM #613721<br><br>BFIS3, #607745<br><br>EA9, #618924 | R OA         | 4 | 4/9 NE + MD                                           | AD | c.2960G > T p.S987I<br><br>c.4952T > G, p.F1651C<br><br>c.788C > T, p.A263V (x2)                                          | missense<br><br>(presumed GoF variants) | Not performed                                      | LP<br><br>LP<br><br>P                                                                                               | c.788C > T: 1 paternally inherited<br><br>1: mother tested negative, father unavailable<br><br>c.2960G > T; c.4952T > G: de novo | NA                                                                             | Whole cohort : first 3 mo of life in 67%<br><br>D1-D10 | Hemiclonic + apneas: 1<br><br>T-C: 3                                                                                                    | BFIS3                           | NA                                                                                     | NA                                                                           | NA | Hypotonia: 2                                         | Mild GDD: 1<br><br>GDD (NA): 1<br><br>Average IQ; verbal and working, low average visual motor fluency, very low visual reasoning: 1<br><br>N: 1 | -                    | -    | EA: 4                                                                                                                                                                           | Mean: 2.7y (range: 10mo-4.5y)   | Ongoing: 4/4                                        | NA                                                              | Mean: 9y (range: 2-16y)      | 37 |
| SCN2A    | DEE11, OMIM #613721<br><br>BFIS3, #607745<br><br>EA9, #618924 | CR?          | 4 | 1                                                     | AD | c.788C > T, p.(Ala263Val)                                                                                                 | missense                                | Not performed                                      | P                                                                                                                   | De novo                                                                                                                          | NA                                                                             | D2                                                     | T                                                                                                                                       | BFIS3                           | NA                                                                                     | NA                                                                           | NA | -                                                    | N                                                                                                                                                | -                    | -    | EA                                                                                                                                                                              | 20mo                            | ongoing                                             | NA                                                              | 5y                           | 38 |

|         |                                                               |     |   |                                                                         |    |                                                                                                                                                                                                                              |                                              |                                                  |        |                               |                                                                                     |                                                             |                                                                                                  |          |                                            |                                       |                                                                                  |                                                                                                                   |                                                                      |                                                                                              |                               |                                                                               |          |                                                                                      |                                                                                                                             |              |    |
|---------|---------------------------------------------------------------|-----|---|-------------------------------------------------------------------------|----|------------------------------------------------------------------------------------------------------------------------------------------------------------------------------------------------------------------------------|----------------------------------------------|--------------------------------------------------|--------|-------------------------------|-------------------------------------------------------------------------------------|-------------------------------------------------------------|--------------------------------------------------------------------------------------------------|----------|--------------------------------------------|---------------------------------------|----------------------------------------------------------------------------------|-------------------------------------------------------------------------------------------------------------------|----------------------------------------------------------------------|----------------------------------------------------------------------------------------------|-------------------------------|-------------------------------------------------------------------------------|----------|--------------------------------------------------------------------------------------|-----------------------------------------------------------------------------------------------------------------------------|--------------|----|
| SCN2A   | DEE11, OMIM #613721<br><br>BFIS3, #607745<br><br>EA9, #618924 | CR  | 4 | 1                                                                       | AD | c.788C>T, p.(Ala263Val)                                                                                                                                                                                                      | missense                                     | Not performed                                    | P      | De novo                       | NA                                                                                  | D1                                                          | T → GTC (often prolonged ; in clusters)                                                          | BFIS3    | Seizure free: 7 mo                         | F-T sharp waves                       | N (4mo)                                                                          | -                                                                                                                 | N                                                                    | -                                                                                            | -                             | EA                                                                            | 15mo     | ongoing                                                                              | NA                                                                                                                          | 19mo         | 39 |
| SCN8A   | EIEE13, OMIM #614558                                          | R   | 4 | Infantile DE/EE<br><br>22 (11F)<br><br>NE: 2/22<br><br>NE + MD: 1       | AD | c.4639T>G, p.Phe1547Val                                                                                                                                                                                                      | missense                                     | Not performed (in silico prediction models used) | LP     | De novo                       | NA                                                                                  | 4m (median)<br><br>range: 0.5–36m                           | F<br><br>T<br><br>ES<br><br>TCS                                                                  | DEE      | Ongoing (reduced after 7y)                 | NA                                    | Background deterioration: 22/22<br><br>FD (> T-P-O)                              | hypotonia                                                                                                         | Severe ID, no SP/EC                                                  | Whole cohort: Cortical blindness: 17/22<br>Microcephaly/decelerating head growth: 4/22 (18%) | yes                           | Dyskinesia                                                                    | NA       | NA                                                                                   | Progressive cortical and subcortical atrophy posttrigonal WM T2 hyperintensity restricted diffusion in the optic radiations | 22y          | 6  |
| SCN8A   | EIEE13, OMIM #614558                                          | CR  | 4 | 1M                                                                      | AD | c.3979A>G p.Ile1327Val                                                                                                                                                                                                       | missense                                     | Not performed (in silico prediction models used) | LP     | De novo                       | WES + Sanger sequencing                                                             | birth                                                       | (NSE) tonic with apnea and bradycardia / focal tonic with eye squeezing and mouthing in clusters | EIEE     | -                                          | -                                     | low-voltage background, interictal epileptiform T discharges ; B-S-like in sleep | Dysmorphic features, congenital multiple arthrogryposis, hip dysplasia, inguinal hernia, hydrocele, kidney stones | Severe DD                                                            | -                                                                                            | -                             | coarse tremor, myoclonias<br><br>central hypotonia alternating with stiffness | At birth | -                                                                                    | N at birth, 5mo: mild F-T atrophy, CC thinning, 11mo: bilateral F-T atrophy, CC thinning, mild myelination delay            | 17 mo (died) | 27 |
| SCN8A   | EIEE13, OMIM #614558                                          | CR  | 4 | 1 M                                                                     | AD | c.3979A>G p.Ile1327Val                                                                                                                                                                                                       | missense                                     | Not performed (previously described)             | LP     | De novo                       | NGS panel                                                                           | birth                                                       | F clonic<br><br>Tonic + apnoea<br><br>NSE                                                        | EIEE     | -                                          | -                                     | N background, C-P szs                                                            | PEG-fed<br><br>Central hypotonia + appendicular hypertonia<br><br>Acquired microcephaly                           | Severe DD                                                            | -                                                                                            | -                             | Exaggerated startle response<br>paroxysmal posturing, jittery movements       | birth    | -                                                                                    | D7: N<br><br>mild cerebellar volume loss, age-appropriate myelination                                                       | NA           | 28 |
| SCN8A   | EIEE13, OMIM #614558                                          | ROA | 4 | 638 EOE pts<br><br>19 pts with SCN8A<br><br>E + MD: 2<br><br>NE + MD: 1 | AD | c.1763A>G                                                                                                                                                                                                                    | Missense?                                    | Not performed                                    | LP     | De novo                       | Sanger sequencing of KCNQ2, STXBP1, SCN8A<br><br>Targeted NGS panel (64; 128 genes) | D1                                                          | T                                                                                                | DEE/EE   | -                                          | -                                     | MFD: 1                                                                           | Acquired microcephaly<br><br>PEG                                                                                  | Severe/profound                                                      | -                                                                                            | Regression: 1 (age NA)        | Myoclonus: 1                                                                  | Neonatal | NA                                                                                   | N                                                                                                                           | n=1 NA       | 25 |
| SCN8A   | EIEE13, OMIM #614558                                          | R   | 4 | 17<br><br>E + MD: 12/17 (70.6%)<br><br>NE + MD: 2 (1F)                  | AD | c.4435A>G, p.Ile1479Val<br><br>c.5615G>T, p.Arg1872Leu                                                                                                                                                                       | missense                                     | Not performed                                    | P: 2/2 | De novo                       | NA                                                                                  | Range : 0-48 mo (Mean : 8.6 mo)<br><br>D1 : 1<br><br>1w : 1 | GTCS: 2<br><br>FIAM: 1<br><br>Clon: 1<br><br>GT: 1<br><br>At Ab: 1<br><br>Multiple: 2/2          | DEE: 2/2 | -                                          | N: 1<br><br>Slow: 1<br><br>FD + GD: 1 | NA: 1<br><br>Ictal: 1                                                            | Hypotonia: 2<br><br>Microcephaly: 1<br><br>Torticollis: 1<br><br>Scoliosis: 1                                     | Absent language: 1<br><br>Language delay: 1<br><br>Non-ambulatory: 1 | yes                                                                                          | Ataxia: 1<br><br>Dystonia : 1 | NA                                                                            | NA       | N: 1<br><br>Progressive cerebellar atrophy: 1<br><br>Progressive cerebral atrophy: 1 | 2y; 19y                                                                                                                     | 26           |    |
| SLC13A5 | EIEE25, OMIM #615905                                          | OA  | 4 | 8 pts from 4 families<br><br>NE + MD: 4/8                               | AR | Compound heterozygous: c.1022G>A, p.Trp341*<br>c.1217_1217 dup11, p.Pro407Argfs*12<br><br>c.425C>T, p.Thr142Met<br>c.655G>A, p.Gly219Arg<br><br>c.680C>T, p.Thr227Met<br>c.1570G>C, p.Asp524His<br><br>Homozygous: c.1280C4T | Nonsense Frameshift<br><br>Missense Missense | Performed                                        | P      | Parents heterozygous carriers | WES                                                                                 | D1 : 4/4                                                    | F (clon): 4/4<br><br>SE: 4/4 (convulsive, hemiconvulsive, non-convulsive)<br><br>Fever-          | EOEE     | Seizure-free: 1 (3y)<br><br>Response to KD | MFD/shifting F: (> post)<br><br>N: 1  | MFD                                                                              | Teeth hypoplasia/hypodontia: 100%<br><br>Microcephaly (none with NE + MD)<br><br>spasticity                       | DD (severe: ¾; mild-to-moderate: 1)                                  | -                                                                                            | -                             | Ataxia: 2<br><br>choreathetosis: 2<br><br>athetosis: 1<br><br>dystonia: 1     | NA       | NA                                                                                   | N: 4/4 with NE + MD<br><br>periventricular leukomalacia-like abnormalities (none with NE + MD)                              | 7.5y (4-10y) | 30 |

|         |                                                |             |   |                                           |     |                                                                                                                                                                               |                   |                                                  |         |                                     |     |                                |                                                                                               |      |               |                                                                                                                       |                                                                      |                                                                                                                      |                                                             |                                          |                                  |                                                                                                                               |                                   |                                |                                                                                               |                            |    |
|---------|------------------------------------------------|-------------|---|-------------------------------------------|-----|-------------------------------------------------------------------------------------------------------------------------------------------------------------------------------|-------------------|--------------------------------------------------|---------|-------------------------------------|-----|--------------------------------|-----------------------------------------------------------------------------------------------|------|---------------|-----------------------------------------------------------------------------------------------------------------------|----------------------------------------------------------------------|----------------------------------------------------------------------------------------------------------------------|-------------------------------------------------------------|------------------------------------------|----------------------------------|-------------------------------------------------------------------------------------------------------------------------------|-----------------------------------|--------------------------------|-----------------------------------------------------------------------------------------------|----------------------------|----|
|         |                                                |             |   |                                           |     | p.Ser427Leu                                                                                                                                                                   | Missense missense |                                                  |         |                                     |     |                                | sensitivity : 6/8                                                                             |      |               |                                                                                                                       |                                                                      |                                                                                                                      |                                                             |                                          |                                  |                                                                                                                               |                                   |                                |                                                                                               |                            |    |
|         |                                                |             |   |                                           |     |                                                                                                                                                                               | missense          |                                                  |         |                                     |     |                                |                                                                                               |      |               |                                                                                                                       |                                                                      |                                                                                                                      |                                                             |                                          |                                  |                                                                                                                               |                                   |                                |                                                                                               |                            |    |
| SLC13A5 | EIEE25, OMIM #615905                           | OA          | 4 | 7 pts from 2 families<br><br>NE + MD: 3/7 | AR  | <u>Compound heterozygosis:</u><br>c.680C>T p.Thr227Met c.655G>A p.Gly219Arg<br><br>c.680C>T p.Thr227Met c.655G>A p.Gly219Arg<br><br><u>Homozygosis:</u> c.1463T>C p.Leu488Pro | missense          | Not performed (in silico prediction models used) | LP: 3/3 | Parents heterozygous carriers       | WES | 2h-1st week                    | SE: 6/7<br><br>Subtle: 5/7<br><br>Clon/hemiconic: 2/7<br><br>NA: 1/7<br><br>Fever-sensitivity | EOEE | 2/7 (age: NA) | T-O discharges (shifting hemispheres): 1<br><br>FD (T): 2<br><br>MFD: 1<br><br>Low voltage background: 1<br><br>NA: 4 | NA                                                                   | Widely spaced teeth, no facial dysmorphisms/hypodontia<br><br>Axial hypotonia: 6/7<br><br>Peripheral hypertonia: 5/7 | Profound: 5/7<br><br>Several words: 2/2<br><br>Walking: 1/7 | -                                        | -                                | Ataxia: 1/7<br><br>Choreoathetosis: 2/7<br><br>Chorea: 1/7<br><br>Dystonia: 2/7<br><br>Dyskinesia: 1/7<br><br>No MD: 3/7      | NA                                | NA                             | "no signs of perinatal insult"                                                                | Mean: 6.7 y (range: 3-14y) | 29 |
| SMC1A   | EIEE85, OMIM #301044                           | Single case | 4 | 1F                                        | XLD | c.1911 + 1G>T p. Thr638Valfs*48                                                                                                                                               | frameshift        | Performed                                        | P       | De novo                             | WES | During the first month of life | Eyelid myoclonia                                                                              | DEE  | ongoing       | F                                                                                                                     | Hyps                                                                 | IUGR, Primary microcephaly<br><br>dysmorphisms<br><br>spastic tetraparesis<br><br>scoliosis<br><br>GERD              | Severe ID (non-verbal)                                      | Poor eye contact                         | NA                               | Hand stereotypies                                                                                                             | 2y                                | NA                             | small frontal lobes, thin CC                                                                  | 7y                         | 42 |
| SYNJ1   | EIEE53 OMIM #617389<br><br>PARK20 OMIM #615530 | OA          | 4 | 6 E + MD (NE: 2/6)<br><br>NE + MD: 2/6    | AR  | c.1938delT c.3365-2A4G                                                                                                                                                        | Premature stop    | performed                                        | P       | Inherited from heterozygous parents | WES | D1, D12                        | eye blinking + "shoulder movements": 1<br><br>jerking/eye deviation: 1<br><br>→ TC, myo: 2/2  | DEE  | refractory    | MFD: 2/2 slow background: 1<br><br>Severely abnormal: 1                                                               | Severely abnormal (discontinuous): 1<br><br>slow background + MFD: 1 | Hypotonia → hypertonia<br><br>Progressive spastic quadriparesis                                                      | Profound DD                                                 | Cortical visual impairment: 1            | Progressive neurological decline | Dystonia opisthotonus: 2/6                                                                                                    | infancy                           | -                              | N (MRS with large creatine peak): 1<br><br>thin CC, periventricular WM gliosis and atrophy: 1 | Died: 2.5y<br><br>Died: 8y | 40 |
| SYNJ1   | EIEE53 OMIM #617389<br><br>PARK20 OMIM #615530 | CR          | 4 | 1 (F)                                     | AR  | Biallelic c.858_862delACAAA                                                                                                                                                   | frameshift        | Not performed                                    | P       | NA                                  | WES | D2                             | Eye twitching, hypertonus and bicycling movements → WS (8mo), myo                             | EOEE | refractory    | NA                                                                                                                    | NA                                                                   | Profound hypotonia → severe spastic quadriparesis                                                                    | profound                                                    | Severe cortical visual impairment        | -                                | Opisthotonic posturing                                                                                                        | infancy                           | Partial response to clonazepam | N                                                                                             | 28mo                       | 41 |
| STXBP1  | EIEE4, OMIM #612164                            | R           | 4 | CR 1 F                                    | AD  | c.416C>T                                                                                                                                                                      | Missense          | Not performed (in silico prediction models used) | P/LP    | De novo                             | WES | D5                             | T + focal                                                                                     | DEE  | -             | -                                                                                                                     | MFD on N background                                                  | Respiratory chain complex I profound deficit                                                                         | GDD                                                         | Severe language and cognitive impairment | yes                              | Marked ataxia<br><br>Head nodding<br><br>Dystonic posturing + tremor<br><br>resting tremor, cogwheel rigidity and hypomimia + | 6y<br><br>7y<br><br>9y<br><br>12y | -                              | N (4mo; 6y)                                                                                   | 12y                        | 34 |



|        |                                                                                               |      |   |                                                                     |    |                                                                                             |                                                                       |                                                  |                             |         |                        |                             |                                                                                      |                                     |                                                 |                                                                         |                     |                                                          |                                                   |                                                  |                 |                                                                                                                                                                         |                                               |    |                           |                            |    |
|--------|-----------------------------------------------------------------------------------------------|------|---|---------------------------------------------------------------------|----|---------------------------------------------------------------------------------------------|-----------------------------------------------------------------------|--------------------------------------------------|-----------------------------|---------|------------------------|-----------------------------|--------------------------------------------------------------------------------------|-------------------------------------|-------------------------------------------------|-------------------------------------------------------------------------|---------------------|----------------------------------------------------------|---------------------------------------------------|--------------------------------------------------|-----------------|-------------------------------------------------------------------------------------------------------------------------------------------------------------------------|-----------------------------------------------|----|---------------------------|----------------------------|----|
|        |                                                                                               |      |   |                                                                     |    |                                                                                             |                                                                       |                                                  |                             |         |                        |                             |                                                                                      |                                     |                                                 |                                                                         |                     |                                                          |                                                   |                                                  | pyramidal signs |                                                                                                                                                                         |                                               |    |                           |                            |    |
| STXBP1 | EIEE4, OMIM #612164                                                                           | R    | 4 | Case series<br><br>5 (1F)<br><br>NE + MD: 2/5                       | AD | c.1702 +1G>A /<br><br>c.875G>A p.Arg292His                                                  | Splice site<br><br>missense                                           | Not performed                                    | P: 2/2                      | De novo | NA                     | Range : D1-8y (mean: 22.6m) | Onset: My: 1/2 T: 1/2 CT: 1 Multiple types: 1<br><br>Follow-up: FIA: 2 T ES Gelastic | DEE                                 | -                                               | Slow, asymmetrical IED<br><br>Bilat independent F ictal activity        | MFD: 1<br><br>FD: 1 | Dysmorphisms<br><br>LL's spasticity<br><br>polymyoclonus | Severe: 4/5 Moderate: 1/5                         | Bruxism: 4/5                                     | -               | Chorea<br>thetosis<br><br>focal dystonia<br><br>startles<br><br>stereotypies<br><br>head tremor; trunk dyskinesia; UUL's resting and postural tremor, cogwheel rigidity | NA                                            | NA | Atrophy                   | 33y ; 45y                  | 33 |
| STXBP1 | EIEE4, OMIM #612164                                                                           | OA   | 4 | 5 positive from a cohort of 52                                      | AD | c.902+IG>A p.Q301fsX1<br><br>c.1720A>C p.T574P<br><br>del exon 8-14<br><br>c.548T>G p.L183R | Frameshift<br><br>Missense<br><br>Intragenic deletion<br><br>missense | Not performed                                    | P<br><br>del exon 8-14 : LP | De novo | Sequencing + array-CGH | Neonatal 4/5                | Onset Clonic: 2 ES: 2 Follow-up ES: 3 F: 1 TC: 1                                     | DEE                                 | 4/4<br><br>6mo: 1<br><br>12mo: 1<br><br>18mo: 1 | B-S (more continuous after 2 mo)                                        | -                   | Hypotonia: 3<br><br>FFT: 1<br><br>Startles: 2            | GDD: 4<br><br>Nonverbal: 4<br><br>Non-ambulant: 1 | Autistic features: 3                             | -               | myoclonus: 2<br><br>tremor: 2<br><br>choreic: 4<br><br>Dyskinetic: 2<br><br>Stereotypies: 2<br><br>Ataxia: 2                                                            | Since birth<br><br><br><br><br>> 2y<br><br>4y | -  | No cortical malformations | mean: 4.25 y, range: 2y-7y | 31 |
| STXBP1 | EIEE4, OMIM #612164                                                                           |      | 4 | 137<br><br>Pos: 13<br><br>E + MD: 6 (3M)<br><br>NE + MD: 1 (STXBP1) | AD | c.296A>G p.Tyr99Cys                                                                         | missense                                                              | Not performed (in silico prediction models used) | LP                          | De novo | WES                    | Neonatal                    | T<br><br>F                                                                           | EOEE<br><br>non-specific multifocal | seizure-free, 6y                                | MFD                                                                     | -                   | Hypotonia                                                | Profound ID                                       | Autistic features                                | -               | Stereotypies                                                                                                                                                            | NA                                            | NA | N                         | 7y                         | 32 |
| VAMP2  | NDD with hypotonia and autistic features with or without hyperkinetic movements, OMIM #618760 | R OA | 4 | 5 unrelated pts E + MD: 2/5 (2 M)<br><br>NE + MD: 1/2               | AD | c.233A>C p.Glu78Ala                                                                         | missense                                                              | Performed                                        | P                           | De novo | WES                    | 1 at birth                  | Focal<br><br>GTCS                                                                    | -                                   | -                                               | Ictal: fast rhythmic activity followed by sharp-and-slow-wave complexes | -                   | Hypotonia<br><br>CVI                                     | Severe ID<br>Non verbal<br><br>non ambulant       | ASD<br><br>Rett-like features<br><br>self-injury | -               | Chorea                                                                                                                                                                  | NA                                            | NA | unremarkable              | 10y                        | 48 |



|      |                                    |             |   |                                                               |    |                                                                                                                                                                                                                                                                                                                                                                                                                                        |                                                                                                   |                                                  |                                                                                                                                                                                                                |                               |                  |                                                                                                           |                                                                                                         |                |   |                                                                                                                    |                                              |                                                                                                                                                                                  |             |   |   |                                                                                                                                                          |    |   |                                                                                                                 |                           |    |
|------|------------------------------------|-------------|---|---------------------------------------------------------------|----|----------------------------------------------------------------------------------------------------------------------------------------------------------------------------------------------------------------------------------------------------------------------------------------------------------------------------------------------------------------------------------------------------------------------------------------|---------------------------------------------------------------------------------------------------|--------------------------------------------------|----------------------------------------------------------------------------------------------------------------------------------------------------------------------------------------------------------------|-------------------------------|------------------|-----------------------------------------------------------------------------------------------------------|---------------------------------------------------------------------------------------------------------|----------------|---|--------------------------------------------------------------------------------------------------------------------|----------------------------------------------|----------------------------------------------------------------------------------------------------------------------------------------------------------------------------------|-------------|---|---|----------------------------------------------------------------------------------------------------------------------------------------------------------|----|---|-----------------------------------------------------------------------------------------------------------------|---------------------------|----|
| WVOX | EIEE28,<br><br>OMIM<br><br>#616211 | R<br><br>OA | 4 | E + MD: 18/20<br><br>NE + MD: 5/20<br><br>NE + possible MD: 1 | AR | <u>Compound heterozygous</u> : c.173-1G>T c.517_1056dup p.[Asp58Alafs*3];[His173_Met352dup]<br><br>c.231_409del c.606_791del p.[Asp77Glufs*27];[Pro203_Arg264del]<br><br>c.953C>T c.517_1056del p.[Ser318Leu];[His173_Met352del]<br><br>c.410_516del c.606_791del p.[Gly137Alafs*2];[Pro203_Arg264del]<br><br>c.410G>A c.517_791del p.[Gly137Glu];[His173llefs*5]<br><br>c.517_1056del c.705dupG p.[His173_Met352del];[His236Alafs*34] | Missense: 2<br><br>Frameshift: 5<br><br>Intragenic deletions: 4<br><br>Intragenic duplications: 1 | Not performed (in silico prediction models used) | LP: c.173-1G>T, c.953C>T, c.410G>A<br><br>P: c.517_1056dup, c.231_409del c.606_791del, c.517_1056del, c.410_516del c.606_791del, c.517_791del, c.410_516del c.606_791del, c.517_791del c.517_1056del c.705dupG | Parents heterozygous carriers | Array-CG/WES/WGS | <u>Whole cohort</u> : Range : D1-7mo mean: 1.7 mo (n=1 NA)<br><br>NE: median D2, mean D7 (range : D1-D20) | <u>Onset</u> : F clonic: Subtle: 1 F: 2 (1 occipital) ES: 2<br><br><u>F/U</u> : Ab: 1 T-C: 2 T: 1 ES: 2 | EOEE ("WOREE") | - | Slow: 2<br><br>Abn: 1<br><br>disorganized: 2<br><br>Hyps: 1<br><br>Mod Hyps: 1<br><br>FD: 3 (> post)<br><br>MFD: 1 | Disorganized without IED: 1/5<br><br>NA: 4/5 | Hypotonia: 4<br><br>pyramidal signs/hypertonia: 100%<br><br>early-onset scoliosis/kiphosis: 100%<br><br>Poor/absent eye contact: 4<br><br>Abnormal ERG: 1<br><br>Abnormal VEP: 1 | Profound DD | - | - | Hypokinesia: 5<br><br>pedalling and boxing: 1<br><br>dystonic: UULL's 2<br><br>Myoclonus: 1<br><br>Startle: 1<br><br>Paroxysmal involuntary movements: 1 | NA | - | N: 1<br><br>thin CC: 2<br><br>hypoplastic CC: 2<br><br>increased CSF spaces: 2<br><br>abn lateral ventricles: 1 | 16.7mo (range: 3mo-3y5mo) | 40 |
|------|------------------------------------|-------------|---|---------------------------------------------------------------|----|----------------------------------------------------------------------------------------------------------------------------------------------------------------------------------------------------------------------------------------------------------------------------------------------------------------------------------------------------------------------------------------------------------------------------------------|---------------------------------------------------------------------------------------------------|--------------------------------------------------|----------------------------------------------------------------------------------------------------------------------------------------------------------------------------------------------------------------|-------------------------------|------------------|-----------------------------------------------------------------------------------------------------------|---------------------------------------------------------------------------------------------------------|----------------|---|--------------------------------------------------------------------------------------------------------------------|----------------------------------------------|----------------------------------------------------------------------------------------------------------------------------------------------------------------------------------|-------------|---|---|----------------------------------------------------------------------------------------------------------------------------------------------------------|----|---|-----------------------------------------------------------------------------------------------------------------|---------------------------|----|

**Table legend. List of abbreviations:** AA: amino acids, Ab: absence, abn: abnormal, At: atonic, CC: corpus callosum, CI: cognitive impairment, CP: cerebral palsy, CR: case report, CSF: cerebrospinal fluid, CVI: central visual impairment, DD: developmental delay, DE: developmental encephalopathy, E: epilepsy, EE: epileptic encephalopathy, EEG: electroencephalogram, ENC: encephalopathy, EPC: Epilepsia partialis continua, ES: epileptic spasms, ESES: electrical status during slow waves sleep, F: female, FIAS: focal impaired awareness seizures, FD: focal discharges, FSE: febrile status epilepticus; FTT: failure to thrive, F/U: follow-up, FS: febrile seizure, GD: generalized discharges, GDD: global developmental delay, Gel: gelastic, GERD: gatro-esophageal reflux disease, HC: hemiclonic, HD: head drop, HyCN: hypoplasia of the caudate nuceus, Hyps: hypsarrhythmia, IS: infantile spasms, L: language, M: male, MFD: multifocal discharges, m: month(s), MD: movement disorder, MIPS: Molecular Inversion Probe Sequencing, MRI: magnetic resonance imaging, Mt: motor, My: myoclonic, MyAb: myoclonic absence, N: novel, n: number, NA: not available, NAA: N-acetyl-aspartate, NGS: next-generation sequencing, Ny: nystagmus, OA: organic acids, OMA: oculo-motor apraxia, OR: optic radiations, PCH: pontocerebellar hypoplasia, PKD: paroxysmal kinesigenic dyskinesia, PPR: photoparoxysmal response, pt(s): patient(s), Pu: published, PV: pathogenic variants, PSW: poly-spikes-and-waves, R: retrospective, Ref: reference, S: suspended, SE: status epilepticus, SGT: single gene testing, SW: spike-and-wave complexes, T: tonic, TC: tonic-clonic, VE: ventricular enlargement, VI: visual impairment, VM: ventriculomegaly; y: year(s), w: weeks, WES: whole exome sequencing,
